# Supplementary material for: Genome-wide identification, evolution and function analysis of UGTs superfamily in cotton
Source: Front Mol Biosci. 2022 Sep 13;9:965403. doi: 10.3389/fmolb.2022.965403 (PMC9513525; doi:10.3389/fmolb.2022.965403)
Supplement: Supplementary file 4 [file Table6.XLSX]

## Sheet: Distribution of UGT genes
Distribution of UGT genes on chromosomes of four cotton species
G. hirsutum(At/Dt) Vs G.barbadense(At/Dt)				G. hirsutum(At/Dt) Vs G.arboreum(A) & G.raimondii(D)				G. barbadense Vs G.arboreum(A) & G.raimondii (D)
Ch.NO.	Genes NO.	Ch.NO.	Genes NO.	Ch.NO.	Genes NO.	Ch.NO.	Genes NO.	Ch.NO.	Genes NO.	Ch.NO.	Genes NO.
GHAt-01	7	GBAt-01	4	GHAt-01	7	GaA01	15	GBAt-01	4	GaA01	15
GHAt-02	9	GBAt-02	11	GHAt-02	9	GaA02	7	GBAt-02	11	GaA02	7
GHAt-03	9	GBAt-03	5	GHAt-03	9	GaA03	12	GBAt-03	5	GaA03	12
GHAt-04	6	GBAt-04	9	GHAt-04	6	GaA04	12	GBAt-04	9	GaA04	12
GHAt-05	13	GBAt-05	14	GHAt-05	13	GaA05	11	GBAt-05	14	GaA05	11
GHAt-06	5	GBAt-06	5	GHAt-06	5	GaA06	4	GBAt-06	5	GaA06	4
GHAt-07	13	GBAt-07	13	GHAt-07	13	GaA07	15	GBAt-07	13	GaA07	15
GHAt-08	3	GBAt-08	3	GHAt-08	3	GaA08	4	GBAt-08	3	GaA08	4
GHAt-09	6	GBAt-09	5	GHAt-09	6	GaA09	7	GBAt-09	5	GaA09	7
GHAt-10	7	GBAt-10	9	GHAt-10	7	GaA10	11	GBAt-10	9	GaA10	11
GHAt-11	5	GBAt-11	7	GHAt-11	5	GaA11	11	GBAt-11	7	GaA11	11
GHAt-12	8	GBAt-12	10	GHAt-12	8	GaA12	16	GBAt-12	10	GaA12	16
GHAt-13	9	GBAt-13	14	GHAt-13	9	GaA13	18	GBAt-13	14	GaA13	18
						Scaffolds(GaA)	3			Scaffolds(GaA)	3
GHDt-01	8	GBDt-01	6	GHDt-01	8	GrD01	16	GBDt-01	6	GrD01	16
GHDt-02	14	GBDt-02	11	GHDt-02	14	GrD02	10	GBDt-02	11	GrD02	10
GHDt-03	12	GBDt-03	12	GHDt-03	12	GrD03	9	GBDt-03	12	GrD03	9
GHDt-04	8	GBDt-04	7	GHDt-04	8	GrD04	5	GBDt-04	7	GrD04	5
GHDt-05	15	GBDt-05	10	GHDt-05	15	GrD05	16	GBDt-05	10	GrD05	16
GHDt-06	5	GBDt-06	5	GHDt-06	5	GrD06	9	GBDt-06	5	GrD06	9
GHDt-07	12	GBDt-07	12	GHDt-07	12	GrD07	10	GBDt-07	12	GrD07	10
GHDt-08	3	GBDt-08	4	GHDt-08	3	GrD08	17	GBDt-08	4	GrD08	17
GHDt-09	6	GBDt-09	6	GHDt-09	6	GrD09	15	GBDt-09	6	GrD09	15
GHDt-10	9	GBDt-10	10	GHDt-10	9	GrD10	7	GBDt-10	10	GrD10	7
GHDt-11	6	GBDt-11	8	GHDt-11	6	GrD11	14	GBDt-11	8	GrD11	14
GHDt-12	16	GBDt-12	14	GHDt-12	16	GrD12	11	GBDt-12	14	GrD12	11
GHDt-13	11	GBDt-13	11	GHDt-13	11	GrD13	13	GBDt-13	11	GrD13	13
Scaffold	1	Scaffolds	3	Scaffold	1			Scaffolds	3
Total(GHAt)	100	Total(GBAt)	109	Total(GHAt)	100	Total(A)	146	Total(GBAt)	109	Total(GaA)	146
Total (GHDt)	125	Total (GBDt)	116	Total (GHDt)	125	Total(D)	152	Total (GBDt)	116	Total(GrD)	152
Total(GHAt/Dt)	225	Total(GBAt/Dt)	225	Total(GHAt/Dt)	225			Total(GBAt/Dt)	225
NOTE: GHAt, GBDt, GaA, and GrD represent G. hirsutum At subgenome, G.barbadense D subgenome, G.arboreum A genome, and G.raimondii D genome, respectively.

## Sheet: Distribution  fig.
GB-At/Dt				GH-At/Dt				Ga-chro(A)
GBAt-01	A01	4		GHAt-01	A01	7		GaA01	Chr01	15
GBAt-02	A02	11		GHAt-02	A02	9		GaA02	Chr02	7
GBAt-03	A03	5		GHAt-03	A03	9		GaA03	Chr03	12
GBAt-04	A04	9		GHAt-04	A04	6		GaA04	Chr04	12
GBAt-05	A05	14		GHAt-05	A05	13		GaA05	Chr05	11
GBAt-06	A06	5		GHAt-06	A06	5		GaA06	Chr06	4
GBAt-07	A07	13		GHAt-07	A07	13		GaA07	Chr07	15
GBAt-08	A08	3		GHAt-08	A08	3		GaA08	Chr08	4
GBAt-09	A09	5		GHAt-09	A09	6		GaA09	Chr09	7
GBAt-10	A10	9		GHAt-10	A10	7		GaA10	Chr10	11
GBAt-11	A11	7		GHAt-11	A11	5		GaA11	Chr11	11
GBAt-12	A12	10		GHAt-12	A12	8		GaA12	Chr12	16
GBAt-13	A13	14		GHAt-13	A13	9		GaA13	Chr13	18	Gr-chro(D)
GBDt-01	D01	6		GHDt-01	D01	8					GrD01	Chr01	16
GBDt-02	D02	11		GHDt-02	D02	14					GrD02	Chr02	10
GBDt-03	D03	12		GHDt-03	D03	12					GrD03	Chr03	9
GBDt-04	D04	7		GHDt-04	D04	8					GrD04	Chr04	5
GBDt-05	D05	10		GHDt-05	D05	15					GrD05	Chr05	16
GBDt-06	D06	5		GHDt-06	D06	5					GrD06	Chr06	9
GBDt-07	D07	12		GHDt-07	D07	12					GrD07	Chr07	10
GBDt-08	D08	4		GHDt-08	D08	3					GrD08	Chr08	17
GBDt-09	D09	6		GHDt-09	D09	6					GrD09	Chr09	15
GBDt-10	D10	10		GHDt-10	D10	9					GrD10	Chr10	7
GBDt-11	D11	8		GHDt-11	D11	6					GrD11	Chr11	14
GBDt-12	D12	14		GHDt-12	D12	16					GrD12	Chr12	11
GBDt-13	D13	11		GHDt-13	D13	11					GrD13	Chr13	13
